# Supplementary material for: Loss of Biliverdin Reductase Increases Oxidative Stress in the Cyanobacterium Synechococcus sp. PCC 7002
Source: Microorganisms. 2023 Oct 20;11(10):2593. doi: 10.3390/microorganisms11102593 (PMC10608806; doi:10.3390/microorganisms11102593)
Supplement: Supplementary file 1 [file microorganisms-11-02593-s001.zip › Table S1.BvdR sequences.xlsx]

## Sheet: Supplementary Table S1
Query Sequence Name	Gene ID	Gene Name	GenBank ID (blastp)	Genome ID	Genome Name	From Genebank Taxonomic group	New Phylogeny name	GOLD Analysis Project Type	Query Start Coord	Query End Coord	Subject Start Coord	Subject End Coord	Bit Score	E-value	Identities	Subject Length	Viral Sequences	In Bins	Comments
unnamed protein product	2999711431	biliverdin reductase	WP_208338209.1	2999708383	Aetokthonos hydrillicola CCALA 1050	Nostocales		Genome Analysis (Isolate)	5	315	13	322	350.132	1.23879e-116	52.7331	338	-	-	epiphytic cyanobacterium
unnamed protein product	2914048077	biliverdin reductase	WP_194006031.1	2914045525	aff. Roholtiella sp. LEGE 12411	Nostocales		Genome Analysis (Isolate)	2	315	11	323	330.487	5.82784e-109	50.9554	331	-	-
unnamed protein product	2993831043	biliverdin reductase	WP_198123196.1	2993828437	Amazonocrinis nigriterrae CENA67	Nostocales		Genome Analysis (Isolate)	5	315	15	324	332.028	2.01178e-109	51.1254	340	-	-	Nostoc -like morphology with a characteristic feature of having heterocytes in series.
unnamed protein product	2775964508	biliverdin reductase	WP_096584407.1	2775506824	Anabaenopsis circularis NIES-21	Nostocales		Genome Analysis (Isolate)	5	315	2	311	320.857	2.13504e-105	52.7331	324	-	-
		Gfo/Idh/MocA family oxidoreductase	WP_218081708.1	3000234880	Anthocerotibacter panamensis C109	Gloeobacterales										320
unnamed protein product	2632406467	biliverdin reductase	WP_039202562.1	2630968589	Aphanizomenon flos-aquae 2012/KM1/D3	Nostocales		Genome Analysis (Isolate)	3	315	12	322	330.102	7.9135e-109	51.4377	332	-	-
unnamed protein product	2788407811	biliverdin reductase	WP_106457565.1	2786546931	Aphanothece hegewaldii CCALA 016	Chroococcales		Genome Analysis (Isolate)	2	316	3	317	303.523	1.86886e-98	46.3492	324	-	-
unnamed protein product	2994225080	biliverdin reductase	WP_214438101.1	2994219403	Atlanticothrix silvestris CENA357	Nostocales		Genome Analysis (Isolate)	2	315	11	323	328.176	4.90282e-108	50.6369	338	-	-
unnamed protein product	2909924687	biliverdin reductase	MBD2486715.1	2909922381	Aulosira sp. FACHB-615	Nostocales		Genome Analysis (Isolate)	5	315	2	311	334.724	8.89436e-111	52.09	324	-	-
unnamed protein product	2510099275	biliverdin reductase	WP_017663662.1	2510065011	Baaleninema simplex PCC 7105	Oscillatoriales		Genome Analysis (Isolate)	6	315	12	321	303.138	2.91911e-98	47.7419	334	-	-
unnamed protein product	2887007778	biliverdin reductase	WP_169154939.1	2887007579	Brasilonema bromeliae SPC951	Nostocales		Genome Analysis (Isolate)	5	315	14	323	333.569	4.03643e-110	50.1608	334	-	-	Brasilonema is a cyanobacterial genus found on the surface of mineral substrates and plants such as bromeliads, orchids and eucalyptus.
unnamed protein product	2776209131	biliverdin reductase	WP_096644065.1	2775506883	Calothrix brevissima NIES-22	Nostocales		Genome Analysis (Isolate)	2	315	27	339	326.25	3.98841e-107	50.6369	350	-	-
unnamed protein product	2510438461	biliverdin reductase	WP_015159667.1	2510436000	Chamaesiphon minutus PCC 6605	Synechococcales		Genome Analysis (Isolate)	4	315	14	325	311.227	2.59947e-101	47.9233	336	-	-
unnamed protein product	2512513726	biliverdin reductase	WP_016876497.1	2512047082	Chlorogloeopsis fritschii PCC 6912	Nostocales		Genome Analysis (Isolate)	2	315	4	316	338.576	2.92996e-112	51.2739	326	-	-
unnamed protein product	2887014818	biliverdin reductase	WP_015154661.1	2887013700	Chroococcidiopsis cubana SAG 39.79	Chroococcidiopsidales		Genome Analysis (Isolate)	3	315	5	317	322.398	6.58098e-106	49.5208	325	-	-
unnamed protein product	3000216966	biliverdin reductase	WP_206815100.1	3000215030	Chroococcus sp. FPU101	Chroococcales		Genome Analysis (Isolate)	2	319	3	321	311.227	1.40987e-101	47.6489	324	-	-
unnamed protein product	647568737	Oxidoreductase family, NAD-binding Rossmann fold protein	WP_006102134.1	647533184	Coleofasciculus chthonoplastes PCC 7420	Oscillatoriales		Genome Analysis (Isolate)	4	307	7	308	333.569	2.53672e-110	52.3026	325	-	-
unnamed protein product	2504682535	biliverdin reductase	WP_015201260.1	2504643013	Crinalium epipsammum PCC 9333	Oscillatoriales		Genome Analysis (Isolate)	4	315	14	323	332.028	1.13527e-109	51.9231	331	-	-
unnamed protein product	2503335815	biliverdin reductase	WP_081451013.1	2503283009	Crocosphaera watsonii WH 8501	Chroococcales		Genome Analysis (Isolate)	5	317	23	335	305.064	6.77825e-99	46.0064	341	-	-
unnamed protein product	2886864342	biliverdin reductase	WP_155084124.1	2886863790	Cyanobacterium aponinum 0216	Chroococcales		Genome Analysis (Isolate)	5	319	3	317	319.701	7.38701e-105	47.3016	321	-	-
unnamed protein product	2886595894	biliverdin reductase	WP_107667156.1	2886592724	Cyanothece sp. BG0011	Oscillatoriales		Genome Analysis (Isolate)	4	317	11	324	305.449	4.20382e-99	46.2025	332	-	-
unnamed protein product	2909799747	biliverdin reductase	WP_190456411.1	2909794272	Cylindrospermum sp. FACHB-282	Nostocales		Genome Analysis (Isolate)	2	315	11	323	322.783	6.75562e-106	50	335	-	-
unnamed protein product	2509554652	biliverdin reductase	WP_015229873.1	2509276056	Dactylococcopsis salina PCC 8305	Synechococcales		Genome Analysis (Isolate)	5	315	6	316	315.079	4.50818e-103	48.8746	326	-	-
unnamed protein product	2994213721	biliverdin reductase	WP_214432033.1	2994211429	Dendronalium phyllosphericum CENA369	Nostocales		Genome Analysis (Isolate)	2	315	14	326	338.961	2.64844e-112	51.9108	336	-	-
unnamed protein product	2909865040	biliverdin reductase	MBD2312834.1	2909863786	Desertifilum sp. FACHB-1129	Desertifilales		Genome Analysis (Isolate)	4	319	5	319	328.176	3.46699e-108	50.1577	323	-	-
unnamed protein product	2913916717	biliverdin reductase	WP_193920200.1	2913912277	Desmonostoc muscorum LEGE 12446	Nostocales		Genome Analysis (Isolate)	2	315	11	331	318.931	2.46656e-104	51.8634	342	-	-
unnamed protein product	2516858943	biliverdin reductase	WP_028090807.1	2516653039	Dolichospermum circinale AWQC131C	Nostocales		Genome Analysis (Isolate)	3	315	12	322	316.235	1.93025e-103	49.5208	332	-	-
unnamed protein product	2510027523	biliverdin reductase	WP_127083470.1	2509887024	Dulcicalothrix desertica PCC 7102	Nostocales		Genome Analysis (Isolate)	3	315	11	322	316.235	2.15192e-103	49.8403	331	-	-
unnamed protein product	2787456819	biliverdin reductase	MCU0523654.1	2786546530	Elainella saxicola E1 (Elainella sp. Prado 103)	Pseudanabaenales		Genome Analysis (Isolate)	1	318	1	319	307.76	3.58397e-100	48.9028	323	-	-
unnamed protein product	2883178517	biliverdin reductase	WP_146297172.1	2883175187	Euhalothece natronophila Z-M001	Chroococcales		Genome Analysis (Isolate)	5	315	3	313	313.153	2.43777e-102	48.8746	322	-	-
unnamed protein product	2808401131	biliverdin reductase	WP_016867436.1	2806311008	Fischerella muscicola CCMEE 5323	Nostocales		Genome Analysis (Isolate)	3	315	5	316	325.865	3.21304e-107	50.4792	326	-	-
unnamed protein product	2509783524	biliverdin reductase	WP_017654802.1	2509601027	Fortiea contorta PCC 7126	Nostocales		Genome Analysis (Isolate)	5	315	7	316	324.709	9.35866e-107	50.8039	327	-	-
unnamed protein product	2503608693	biliverdin reductase	WP_015172724.1	2503538020	Geitlerinema sp. PCC 7407	Oscillatoriales		Genome Analysis (Isolate)	6	315	9	321	313.538	4.03618e-102	53.6741	345	-	-
unnamed protein product	2509875688	biliverdin reductase	WP_017294707.1	2509601046	Geminocystis herdmanii PCC 6308	Chroococcales		Genome Analysis (Isolate)	5	308	12	315	338.961	2.75596e-112	51.9737	331	-	-	a sister taxon to the genus Cyanobacterium. Geminocystis differs from Cyanobacterium by genetic position (<94.4% of similarity) and more importantly by its different type of cell division. Because strain PCC 6308 was designated as a reference strain of the Synechocystis cluster 1 in Bergey's Manual, the members of this genetic cluster have to be revised and reclassified into Geminocystis gen. nov.
		biliverdin reductase	BAC88791.1	637000121	Gloeobacter violaceus PCC 7421	Gloeobacterales										332
unnamed protein product	2508646201	biliverdin reductase	WP_006528569.1	2508501033	Gloeocapsa sp. PCC 73106	Chroococcales		Genome Analysis (Isolate)	4	317	10	324	348.591	4.56695e-116	53.6508	333	-	-	biofilm‐forming bacteria that were found to live on building materials such as limestone
unnamed protein product	2882384720	biliverdin reductase	WP_099699406.1	2882382925	Gloeopcapsopsis sp. IPPAS B-1203 (formerly Chroococcales cyanobacterium IPPAS B-1203)	Chroococcales		Genome Analysis (Isolate)	5	315	13	321	327.405	9.08589e-108	49.5177	329	-	-
unnamed protein product	643480031	oxidoreductase domain protein	WP_012599147.1	643348533	Gloeothece citriformis PCC 7424	Chroococcales		Genome Analysis (Isolate)	5	319	17	332	307.76	4.91926e-100	49.3671	336	-	-
unnamed protein product	2503638425	biliverdin reductase	WP_015227653.1	2503538028	Halothece sp. PCC 7418	Chroococcales		Genome Analysis (Isolate)	5	304	6	305	310.071	5.56632e-101	50.3333	326	-	-
unnamed protein product	2529421146	biliverdin reductase	KOP26937.1	2529292566	Hapalosiphon welwitschii UH strain IC-52-3 (Hapalosiphon sp. MRB220)	Nostocales		Genome Analysis (Isolate)	3	315	5	324	310.071	6.70473e-101	48.2866	334	-	-
unnamed protein product	2628359231	biliverdin reductase	WP_201280426.1	2627853647	Hassallia byssoidea VB512170	Nostocales		Genome Analysis (Isolate)	2	315	9	321	327.791	7.82043e-108	49.6815	334	-	-
unnamed protein product	2814320664	biliverdin reductase	MBC6455299.1	2814122959	Hormoscilla bacterium SP5CHS1	Oscillatoriales		Metagenome-Assembled Genome	4	318	24	338	307.76	5.84875e-100	52.2152	344	-	-
unnamed protein product	2999947777	biliverdin reductase	WP_144865451.1	2999946261	Hyella patelloides LEGE 07179 ERS2782937	Pleurocapsales		Genome Analysis (Isolate)	1	318	1	319	337.035	1.14386e-111	51.0972	324	-	-
unnamed protein product	2914088050	biliverdin reductase	WP_190835536.1	2914081374	Iningainema sp. BLCCT55	Nostocales		Genome Analysis (Isolate)	4	314	1	309	308.145	2.94766e-100	48.8746	327	-	-
unnamed protein product	2508873782	biliverdin reductase	WP_019487810.1	2508501075	Kamptonema formosum PCC 6407	Oscillatoriales		Genome Analysis (Isolate)	2	315	11	323	329.331	1.45815e-108	50.3185	333	-	-
unnamed protein product	8001147213	biliverdin reductase	MBD6619911.1	8001140216	Komarekiella sp. 'clone 1' (Komarekiella delphini-convector SJRDD-AB1)	Nostocales		Genome Analysis (Isolate)	2	315	11	323	328.946	3.13707e-108	51.5924	339	-	-
unnamed protein product	2919986362	biliverdin reductase	MBD2035010.1	2919984651	Leptolyngbya sp. FACHB-321	Pseudanabaenales		Genome Analysis (Isolate)	4	319	12	330	314.309	1.25792e-102	50.1567	334	-	-
unnamed protein product	2982092204	biliverdin reductase	WP_200906370.1	2982086255	Limnoraphis robusta CS-951	Oscillatoriales		Genome Analysis (Isolate)	4	319	16	335	315.849	3.48083e-103	49.375	340	-	-
unnamed protein product	2909915755	biliverdin reductase	WP_190353528.1	2909914141	Limnothrix sp. FACHB-881	Pseudanabaenales		Genome Analysis (Isolate)	5	315	8	322	312.383	5.97076e-102	50.6329	331	-	-
unnamed protein product	2914044615	biliverdin reductase	WP_194027949.1	2914040186	Lusitaniella coriacea LEGE 07157	Pseudanabaenales		Genome Analysis (Isolate)	2	319	13	330	330.102	9.32506e-109	51.25	333	-	-
unnamed protein product	640015543	Homoserine dehydrogenase, NAD-binding	WP_009783607.1	639857035	Lyngbya sp. PCC 8106	Oscillatoriales		Genome Analysis (Isolate)	4	318	16	334	317.775	7.01934e-104	49.2163	342	-	-
unnamed protein product	2517239755	biliverdin reductase	WP_017315199.1	2517093042	Mastigocladopsis repens PCC 10914	Nostocales		Genome Analysis (Isolate)	13	315	22	323	306.605	1.36908e-99	48.8449	336	-	-
unnamed protein product	2724938176	biliverdin reductase	WP_058183516.1	2724678989	Mastigocoleus testarum BC008	Nostocales		Genome Analysis (Isolate)	4	315	13	323	328.946	2.13452e-108	50.9615	332	-	-
unnamed protein product	2909854082	biliverdin reductase	WP_172189284.1	2909848527	Microcoleus asticus IPMA8	Oscillatoriales		Genome Analysis (Isolate)	2	319	14	331	318.161	4.24944e-104	48.5893	337	-	-
		biliverdin reductase	BCU14102.1	2831434989	Microcystis aeruginosa NIES-88	Chroococcales										329
unnamed protein product	2515174138	biliverdin reductase	WP_075901060.1	2515154003	Moorena bouillonii PNG	Oscillatoriales		Genome Analysis (Isolate)	4	315	10	320	322.783	5.47326e-106	49.359	327	-	-
unnamed protein product	2598891610	biliverdin reductase	WP_036481379.1	2597490276	Myxosarcina sp. GI1	Pleurocapsales		Genome Analysis (Isolate)	1	319	1	319	330.487	4.22456e-109	50.4702	323	-	-
unnamed protein product	2637006932	biliverdin reductase	WP_081980606.1	2636415546	Neosynechococcus sphagnicola CAUP A 1101	Pseudanabaenales		Genome Analysis (Isolate)	4	314	13	322	327.02	2.02607e-107	51.4469	343	-	-
unnamed protein product	2563162330	biliverdin reductase	AHJ29647.1	2562617131	Nodularia spumigena CCY9414	Nostocales		Genome Analysis (Isolate)	2	315	20	332	339.732	1.86197e-112	52.8662	348	-	-
unnamed protein product	2617917240	biliverdin reductase	WP_012410087.1	2617270889	Nostoc punctiforme PCC 73102	Nostocales		Genome Analysis (Isolate)	2	315	13	325	331.257	2.4123e-109	53.5032	333	-	-
unnamed protein product	2917559294	biliverdin reductase	WP_190646729.1	2917558857	Oculatella sp. FACHB-28	Pseudanabaenales		Genome Analysis (Isolate)	4	315	14	326	328.176	4.15743e-108	52.3962	335	-	-
unnamed protein product	2831765003	biliverdin reductase	WP_124144343.1	2831758409	Okeania hirsuta PAB10Feb10-1	Oscillatoriales		Genome Analysis (Isolate)	4	315	16	326	324.324	1.53362e-106	50.9615	334	-	-
unnamed protein product	2509423607	biliverdin reductase	WP_015150543.1	2509276028	Oscillatoria acuminata PCC 6304	Oscillatoriales		Genome Analysis (Isolate)	4	308	1	306	312.383	6.95208e-102	50.4886	329	-	-
unnamed protein product	2910176403	biliverdin reductase	WP_190451504.1	2910170622	Phormidium sp. FACHB-592	Oscillatoriales		Genome Analysis (Isolate)	4	319	12	330	319.701	8.46473e-105	50.7837	334	-	-
unnamed protein product	2909935198	biliverdin reductase	WP_054469638.1	2909929793	Planktothricoides sp. FACHB-1261	Oscillatoriales		Genome Analysis (Isolate)	4	314	23	333	336.65	3.20259e-111	51.4469	346	-	-
unnamed protein product	2602465628	biliverdin reductase	WP_026795014.1	2602041639	Planktothrix agardhii NIVA-CYA 15	Oscillatoriales		Genome Analysis (Isolate)	4	319	16	331	324.324	2.17824e-106	49.8423	340	-	-
unnamed protein product	2914398874	biliverdin reductase	WP_228059362.1	2914397844	Plectonema cf. radiosum LEGE 06105	Oscillatoriales		Genome Analysis (Isolate)	5	315	2	310	317.775	3.46801e-104	49.1961	318	-	-
unnamed protein product	2509706372	biliverdin reductase	WP_019504186.1	2509601013	Pleurocapsa sp. PCC 7319	Pleurocapsales		Genome Analysis (Isolate)	1	319	6	325	314.309	1.24305e-102	47.5	329	-	-
unnamed protein product	2830827953	biliverdin reductase	MBC6417720.1	2830827416	Prochloron sp. SP5CPC1 (Candidatus Praprochloron terpiosi SP5CPC1)	Synechococcales		Metagenome-Assembled Genome	4	317	1	314	335.88	2.23957e-111	51.5924	319	-	-
unnamed protein product	2919888365	biliverdin reductase	WP_190600967.1	2919888281	Richelia sinica FACHB-800	Nostocales		Genome Analysis (Isolate)	5	315	14	324	331.257	2.41373e-109	51.7685	334	-	-
unnamed protein product	643474289	oxidoreductase domain protein	ACK65271.1	643348535	Rippkaea orientalis PCC 8801	Chroococcales		Genome Analysis (Isolate)	6	318	25	338	324.324	2.3522e-106	51.746	342	-	-
unnamed protein product	2510089460	biliverdin reductase	WP_015120305.1	2510065008	Rivularia sp. PCC 7116	Chroococcales		Genome Analysis (Isolate)	4	319	1	315	318.931	1.27201e-104	50.4732	318	-	-
unnamed protein product	2917549595	biliverdin reductase	WP_193910369.1	2917549083	Romeria aff. gracilis LEGE 07310	Pseudanabaenales		Genome Analysis (Isolate)	3	319	2	321	309.686	7.71934e-101	50.9375	327	-	-
unnamed protein product	2628063724	biliverdin reductase	MBP0030032.1	2627853560	Roseofilum sp. Guam_bin12	Desertifilales		Metagenome-Assembled Genome	4	318	5	319	304.679	5.4595e-99	48.4177	326	-	-
unnamed protein product	2551961266	biliverdin reductase	WP_017747168.1	2551306141	Scytonema hofmanni PCC 7110	Nostocales		Genome Analysis (Isolate)	5	314	14	322	331.643	2.47e-109	50.9677	335	-	-
unnamed protein product	2914392847	biliverdin reductase	WP_187039235.1	2914391228	Sphaerospermopsis sp. LEGE 00249	Nostocales		Genome Analysis (Isolate)	4	315	12	322	318.546	2.38286e-104	50	333	-	-
unnamed protein product	2506598778	biliverdin reductase	WP_033373986.1	2506520011	Spirulina subsalsa PCC 9445	Spirulinales		Genome Analysis (Isolate)	6	314	12	320	306.605	1.46186e-99	49.1909	332	-	-
unnamed protein product	2503800948	biliverdin reductase	WP_015194041.1	2503754019	Stanieria cyanosphaera PCC 7437	Pleurocapsales		Genome Analysis (Isolate)	5	315	10	320	321.627	1.76218e-105	52.4116	334	-	-
unnamed protein product	2790881903	biliverdin reductase	WP_106256875.1	2788500495	Stenomitos frigidus ULC18	Pseudanabaenales		Genome Analysis (Isolate)	4	319	12	329	338.961	2.47312e-112	53.7736	332	-	-
unnamed protein product	2708940778	biliverdin reductase	WP_041443610.1	2708742468	Synechococcus sp. PCC 7002	Synechococcales	Enugrolinea euryhalinus PCC 7002	Genome Analysis (Isolate)	1	319	1	319	653.67	0	100	319	-	-
unnamed protein product	2562385478	biliverdin reductase	WP_010871427.1	2561511183	Synechocystis sp. PCC 6803	Synechococcales		Genome Analysis (Isolate)	5	308	12	315	306.99	9.66347e-100	50	328	-	-
		Gfo/Idh/MocA family oxidoreductase	WP_279611289.1		Thermostichus vulcanus	Thermostichales										324
unnamed protein product	2776129485	biliverdin reductase	WP_089128461.1	2775506872	Tolypothrix sp. NIES-4075	Nostocales		Genome Analysis (Isolate)	2	315	9	321	327.405	1.1212e-107	48.4076	335	-	-
unnamed protein product	2909910009	biliverdin reductase	WP_190556896.1	2909908154	Trichocoleus sp. FACHB-262	Synechococcales		Genome Analysis (Isolate)	1	315	1	321	328.946	2.37907e-108	51.7134	331	-	-
unnamed protein product	2629600018	biliverdin reductase	MBS9772707.1	2627853943	Trichodesmium erythraeum GBRTRLIN201 (IMS101 [MAG])	Oscillatoriales		Metagenome-Assembled Genome	5	315	16	325	331.643	2.02847e-109	51.4469	335	-	-
unnamed protein product	2914288535	biliverdin reductase	WP_127052092.1	2914284107	Trichormus variabilis (formerly Anabaena variabilis)	Nostocales		Genome Analysis (Isolate)	4	315	13	323	322.398	8.2199e-106	50.9615	335	-	-
unnamed protein product	2886709419	biliverdin reductase	WP_096828613.1	2886709151	Tychonema bourrellyi FEM_GT703	Oscillatoriales		Genome Analysis (Isolate)	2	315	14	326	310.071	6.34953e-101	48.7261	337	-	-
unnamed protein product	2887274086	biliverdin reductase	TBR61042.1	2887272113	Westiellopsis prolifica IICB1	Nostocales		Genome Analysis (Isolate)	3	315	4	315	320.857	2.77492e-105	49.2013	325	-	-
unnamed protein product	2508651132	biliverdin reductase	WP_006509416.1	2508501034	Xenococcus sp. PCC 7305	Pleurocapsales		Genome Analysis (Isolate)	1	315	1	315	324.709	7.93303e-107	50.4762	324	-	-
